# Supplementary material
Source: Elsevier journal article supplement (https://www.sciencedirect.com/science/article/pii/S1699258X10001397)
Supplement: mmc1 [file S1699258X10001397:mmc1.doc]

TABLA 6-A

| **ÍTEMS DE ESPACIOS FÍSICOS** | **DEFINICIÓN** | **CRITERIO** | **PUNTOS** |
| --- | --- | --- | --- |
| ***1. Consultas externas Hospital*** | Número de consultas/día útiles para asistencia a pacientes en Hospital de referencia | 3-5 | 1 |
| > 5 | 2 |
| ***2. Consultas externas CCEE*** | Disponibilidad de consultas útiles para asistencia a pacientes en Centros de Especialidades | SI | 1 |
| ***3. Hospitalización propia*** | Ingresos a cargo de la Unidad de Reumatología | SI | 1 |
| ***4. Espacio para técnicas especiales*** | Espacio para técnicas especiales de reumatología | SI | 1 |
| ***5. Sala de reuniones*** | Local para reuniones de la unidad docente | SI | 1 |
| ***6. Área de trabajo residentes*** | Área de trabajo específica para residentes, diferenciada del espacio asistencial | SI | 1 |
| ***7. Secretaría*** | Secretaría para el desarrollo de las actividades de la unidad | Propia | 2 |
| Compartida | 1 |
| ***8. Laboratorio de investigación*** | La unidad Docente dispone de un laboratorio de investigación | Propio | 2 |
| Compartido | 1 |
| ***9. Hospital de día*** | Hospital de día | SI | 1 |
| ***10. Otras especialidades*** | Obligatorio: Medicina Interna, Pediatría, Cirugía Ortopédica, Rehabilitación y al menos una de las siguientes: cardiología, cuidados intensivos, aparato digestivo, neumología, nefrología, endocrinología, neurología y enfermedades infecciosas. | ≤5 | 1 |
| >5 | 2 |

**TABLA 6-B**

| **ÍTEMS DE RECURSOS MATERIALES** | **DEFINICIÓN** | **CRITERIO** | **PUNTOS** |
| --- | --- | --- | --- |
| ***11. Microscopio de luz polarizada*** | Microscopio para examen y detección de cristales | Propio | 2 |
| Compartido | 1 |
| ***12. Ecógrafo*** | Ecografía de aparato locomotor | Propio | 2 |
| Compartido | 1 |
| ***13. Capilaroscopio*** | Microscopio para técnicas de capilaroscopia | Propio | 2 |
| Compartido | 1 |
| ***14 Artroscopio reumatológico*** | Artroscopio de aguja fina | Propio | 2 |
| ***15. Densitómetro óseo*** | Aparato de Densitometría ósea | Propio | 2 |
|  |  |
| ***16. Otras técnicas reumatológicas*** | Otras técnicas de uso en Reumatología: estudios neurofisiológicos, bloqueos nerviosos, infiltración con control ecográfico o radioscópico, infiltración epidural y facetaria, podometría, radiosinovectomía, iontoforesis, TENS, test de Schirmer, colocación de férulas articulares y otras ortesis, etc. | Propio | 1 |
| ***17. Material para la realización de biopsias*** | Material para la realización de biopsia sinovial, glándula salival, muscular, ósea, cutánea, aspirado de grasa abdominal, etc… | > de 1 tipo de biopsia | 2 |
| 1 tipo de biopsia | 1 |

**TABLA 6-C**

| **Ítems de Recursos humanos** | **DEFINICIÓN** | **CRITERIO** | **PUNTOS** |
| --- | --- | --- | --- |
| ***18. Reumatólogos de Plantilla*** | Número de personal de plantilla médica adscritos a tiempo completo y con contratos indefinidos a la Unidad Docente | 4 | 1 |
| 5-7 | 2 |
| ≥8 | 3 |
| ***19. Tiempo desde la constitución de la Unidad Docente*** | Años desde la constitución de la Unidad Docente | ≥3 | 1 |
| ***20. Otros profesionales sanitarios*** | Enfermero/as, terapeutas ocupacionales u otros profesionales sanitarios adscritos a la unidad | 1 | 1 |
| 2 o mas | 2 |
| ***21. Estructura de personal estable*** | Años de estructura de personal (plantilla) estables | ≥2 | 1 |

**TABLA 6-D**

| **Ítems de Formac. Méd. Continuada** | **DEFINICIÓN** | **CRITERIO** | **PUNTOS** |
| --- | --- | --- | --- |
| ***22. Acceso a Internet*** | Acceso a Internet | SI | 1 |
| ***23. Ordenador personal*** | Acceso de los residente a ordenadores personales | SI | 1 |
| ***24. Acceso a Publicaciones*** | Versiones físicas o electrónicas de las principales revistas de Medicina y Reumatología | SI | 1 |
| ***25. Acceso a Libros*** | Principales libros de texto de Reumatología nacionales o internacionales | SI | 1 |

**TABLA 6-E**

| **ÍTEMS DE Organización** | **DEFINICIÓN** | **CRITERIO** | **PUNTOS** |
| --- | --- | --- | --- |
| ***26. Normas de organización interna*** | Normativa de organización interna explícita y documentada | SI | 1 |
| ***27. Programa anual de actividades*** | Programa anual de actividades explícito y documentado | SI | 1 |
| ***28. Protocolos / procedimientos / procesos*** | Número de protocolos, procedimientos y procesos documentados y evaluados | ≤5 | 1 |
| 6-10 | 2 |
| ≥11 | 3 |
| ***29. Historia Clínica Electrónica*** | Sistema de introducción y acceso a información electrónica de pacientes | SI | 1 |
| ***30. Política de calidad*** | Política de calidad explícita y documentada | SI | 1 |

**TABLA 6-F**

| **ASISTENCIA** | **DEFINICIÓN** | **CRITERIO** | **PUNTOS** |
| --- | --- | --- | --- |
| ***31. Consulta Nuevos*** | Número de pacientes/año nuevos | ≥2112 | 1 |
| ≥3168 | 2 |
| ≥4224 | 3 |
| ***32. Consultas Revisiones*** | Número de pacientes/año revisión | ≥5280 | 1 |
| ≥7920 | 2 |
| ≥10560 | 3 |
| ***33. Número de ingresos*** | Número de pacientes/año ingresados a cargo de la Unidad | 65-100 | 1 |
| 101-150 | 2 |
| >150 | 3 |
| ***34. Peso medio*** | Peso medio de los ingresos/año a cargo de la Unidad | ≤1,30 | 1 |
| >1,30 | 2 |
| ***35. IEMA Servicios REUMA grupo*** | Índice de estancia media ajustado a casuística en comparación con otras Unidades/Servicios de Reumatología | ≤1,00 | 1 |
| >1,00 | 0 |
| ***36. Ingresos/año Hospital de Día*** | Número de ingresos de Hospital de Día anuales | De 300 a 500 | 1 |
| >500 | 2 |
| ***37. Consultas monográficas*** | Existencia de al menos una consulta monográfica | SI | 1 |

**TABLA 6-G**

| **ÍTEMS Actividad Docente** | **DEFINICIÓN** | **CRITERIO** | **PUNTOS** |
| --- | --- | --- | --- |
| ***38. Coordinador docente*** | Existencia de coordinador docente (miembro de la unidad de Reumatología con experiencia laboral, trayectoria docente y de investigación y con habilidades comunicativas) | SI | 2 |
| ***39. Memoria docente*** | Existencia de memoria docente | SI | 2 |
| ***40. Nº de sesiones semanales*** | Índice cuantitativo que incluye cualquier tipo de sesión:  ***Sesión clínica temática, Sesión bibliográfica Sesión radiologica Sesion de anatomía patologica Sesión de casos problema Sesión de tratamientos biológicos Sesiones hospitalarias*** | 5 o más | 4 |
| 3-4 | 3 |
| 1-2 | 2 |
| ***41. Discusión semanal hospitalizados*** | Índice cualitativo | SI | 1 |

**TABLA 6-H**

| **ÍTEMS INVESTIGACIÓN** | **DEFINICIÓN** | **CRITERIO** | **PUNTOS** |
| --- | --- | --- | --- |
| ***42. Artículos publicados*** | Artículos originales publicados en revistas científicas propias de la especialidad, por alguno de los miembros de la Unidad, en los últimos tres años. | 1 | 1 |
| 2 | 2 |
| 3 o mas | 3 |
| ***43. Artículos publicados en revistas, indexados*** | Artículos originales publicados en revistas científicas indexadas propias de la especialidad de reumatología o del área biomédica, por alguno de los miembros de la Unidad. **MEDIA ANUAL** de los últimos tres años | 1 | 2 |
| 2 | 3 |
| 3 o mas | 4 |
| ***44. Artículos publicados, primer/segundo cuartil*** | Artículos originales publicados en revistas científicas indexadas propias de la especialidad de reumatología o del área biomédica, por alguno de los miembros de la Unidad, que se encuentren en el primer o segundo cuartil de su especialidad, en los últimos tres años. | SI | 3 |
| ***45. Participación en Proyectos*** | Proyectos financiados por organismos públicos y sociedades científicas, en convocatorias competitivas, en los que participe alguno de los miembros de la Unidad, en los últimos tres años. | 1 | 1 |
| >1 | 2 |
| ***46. Investigación Post MIR*** | Residentes que hayan completado, o estén completando en la Unidad, un período de Investigación post-MIR de dos o tres años, financiado por organismos públicos y sociedades científicas, en convocatorias competitivas, en los últimos 3 años. | SI | 1 |
| ***47. Tesis doctorales*** | Tesis doctorales dirigidas o defendidas por miembros de la Unidad en los últimos 5 años. | 1 | 1 |
| >1 | 2 |
| ***48. Patentes*** | Patentes registradas en los últimos 10 años | SI | 1 |

**TABLA 7-A**

| **ÍTEMS DE ESPACIOS FÍSICOS** | **DOCUMENTACIÓN ACREDITATIVA** |
| --- | --- |
| ***1. Consultas externas Hospital*** | Certificación por parte del Director Gerente del centro del número de locales/día útiles para asistencia a pacientes en la unidad de Reumatología |
|
| ***2. Consultas externas CCEE*** | Certificación por parte del Director Gerente del centro del número de locales/día útiles para asistencia reumatológica a pacientes en Centros de Especialidades dependientes del centro. |
| ***3. Hospitalización propia*** | Certificación por parte del Director Gerente del centro del número de altas a cargo de la Unidad de Reumatología. |
| ***4. Espacio para técnicas especiales*** | Certificación por parte del Director Gerente del centro de la existencia de un espacio para técnicas especiales de reumatología |
| ***5. Sala de reuniones*** | Certificación por parte del Director Gerente del centro de la existencia de un local para reuniones de la unidad docente |
| ***6. Área de trabajo residentes*** | Certificación por parte del Director Gerente del centro de la existencia de un área de trabajo específica para residentes, diferenciada del espacio asistencial |
| ***7. Secretaría*** | Certificación por parte del Director Gerente del centro de la disponibilidad organizativa de una Secretaría para el desarrollo de las actividades de la unidad |
|
| ***8. Laboratorio de investigación*** | Certificación por parte del Presidente de la Comisión de Investigación del centro de la disponibilidad de un laboratorio de investigación por parte de la unidad de Reumatología |
|
| ***9. Hospital de día*** | Certificación por parte del Director Gerente del centro de la existencia de un hospital de día en el que los pacientes reumáticos reciben tratamientos intravenosos bajo la supervisión de los reumatólogos del centro |
| ***10. Otras especialidades*** | Certificación por parte del Presidente de la Comisión de Docencia de la existencia en el centro de las especialidades de Medicina Interna, Pediatría, Cirugía Ortopédica, Rehabilitación y al menos cinco de las siguientes: cardiología, cuidados intensivos, aparato digestivo, neumología, nefrología, endocrinología, neurología y enfermedades infecciosas.…. |
|

**TABLA 7-B**

| **ÍTEMS DE RECURSOS MATERIALES** | **DOCUMENTACIÓN ACREDITATIVA** |
| --- | --- |
| ***11. Microscopio de luz polarizada*** | Registro de inventario |
|
| ***12. Ecógrafo*** | Registro de inventario |
|
| ***13. Capilaroscopio*** | Registro de inventario |
|
| ***14 Artroscopio reumatológico*** | Registro de inventario |
| ***15. Densitómetro óseo*** | Registro de inventario |
|
| ***16. Otras técnicas reumatológicas*** | Registro de inventario |
| ***17. Material para la realización de biopsias*** | Registro de inventario |
|

**TABLA 7-C**

| **Ítems de Recursos humanos** | **DOCUMENTACIÓN ACREDITATIVA** |
| --- | --- |
| ***18. Reumatólogos de Plantilla*** | Certificación por parte del Jefe de Recursos Humanos del centro de la plantilla médica adscrita a la Unidad de Reumatología, en la que conste nombre, apellidos, DNI, puesto jerárquico, tipo de contrato que vincula al reumatólogo al centro y su antigüedad |
|
|
| ***19. Tiempo desde la constitución de la Unidad Docente*** | Certificación por parte del Director Gerente del centro año de constitución de la unidad de Reumatología |
| ***20. Otros profesionales sanitarios*** | Certificación por parte del Jefe de Recursos Humanos del centro de los enfermero/as, terapeutas ocupacionales u otros profesionales sanitarios adscritos a la unidad de Reumatología |
|
| ***21. Estructura de personal estable*** | Certificación por parte del Jefe de Recursos Humanos del centro de la plantilla médica adscrita a la Unidad de Reumatología, en la que conste nombre, apellidos, DNI, puesto jerárquico, tipo de contrato que vincula al reumatólogo al centro y su antigüedad |

**TABLA 7-D**

| **Ítems de Formac. Méd. Continuada** | **DOCUMENTACIÓN ACREDITATIVA** |
| --- | --- |
| ***22. Acceso a Internet*** | Certificación por parte del Jefe de Unidad de Reumatología de la disponibilidad de acceso a Internet |
| ***23. Ordenador personal*** | Certificación por parte del Jefe de Unidad de Reumatología de la disponibilidad de acceso de los residente a ordenadores personales |
| ***24. Acceso a Publicaciones*** | Certificación por parte del Bibliotecario/a del centro de la disponibilidad de versiones físicas o electrónicas de las principales revistas de Medicina y Reumatología |
| ***25. Acceso a Libros*** | Certificación por parte del Bibliotecario/a del centro de la disponibilidad de los principales libros de texto de Reumatología nacionales o internacionales |

**TABLA 7-E**

| **ÍTEMS DE Organización** | **DOCUMENTACIÓN ACREDITATIVA** |
| --- | --- |
| ***26. Normas de organización interna*** | Aportación del documento en el que figure la normativa de organización interna explícita y documentada |
| ***27. Programa anual de actividades*** | Aportación del documento en el que figure el programa anual de actividades explícito y documentado |
| ***28. Protocolos / procedimientos / procesos*** | Aportación de los documentos en los que figuren los protocolos, procedimientos y procesos documentados y evaluados |
|
|
| ***29. Historia Clínica Electrónica*** | Certificación por parte del Director Gerente de la existencia de un sistema de introducción y acceso a información electrónica de pacientes |
| ***30. Política de calidad*** | Aportación del documento en el que figure explícita y documentadamente la política de calidad d la unidad |

**TABLA 7-F**

| **ASISTENCIA** | **DOCUMENTACIÓN ACREDITATIVA** |
| --- | --- |
| ***31. Consulta Nuevos*** | Certificación por parte del Director Gerente del centro del número de pacientes nuevos/año |
| ***2. Consultas Revisiones*** | Certificación por parte del Director Gerente del centro del número de pacientes sucesivos/año |
| ***33. Número de ingresos*** | Certificación por parte del Director Gerente del centro del número de pacientes/año ingresados a cargo de la Unidad de Reumatología |
| ***34. Peso medio*** | Certificación por parte del Director Gerente del centro del peso medio de los ingresos/año a cargo de la Unidad |
| ***35. IEMA Servicios REUMA grupo*** | Certificación por parte del Director Gerente del centro del índice de estancia media ajustado a casuística en comparación con otras Unidades/Servicios de Reumatología |
| ***36. Consultas monográficas*** | Certificación y descripción por parte del Jefe de la Unidad de Reumatología de la existencia de consultas monográficas |
| ***37. Ingresos/año Hospital de Día*** | Certificación por parte del Director Gerente del centro del número de ingresos de Hospital de Día anuales a cargo de Reumatología |

**TABLA 7-G**

| **ÍTEMS Actividad Docente** | **DOCUMENTACIÓN ACREDITATIVA** |
| --- | --- |
| ***38. Coordinador docente*** | Certificación por parte del Jefe de la Unidad de Reumatología y del Presidente de la Comisión de Docencia de la existencia de coordinador docente (miembro de la unidad de Reumatología con experiencia laboral, trayectoria docente y de investigación y con habilidades comunicativas) |
| ***39. Memoria docente*** | Presentación de una memoria docente por parte del Jefe de Unidad de Reumatología |
| ***40. Nº de sesiones semanales*** | Descripción pormenorizada de las sesiones que se realizan en el hospital y en la unidad docente |
|
|
| ***41. Discusión semanal hospitalizados*** | Descripción de la sesión de planta |

**TABLA 7H**

| **ÍTEMS INVESTIGACIÓN** | **DOCUMENTACIÓN ACREDITATIVA** |
| --- | --- |
| ***42. Artículos publicados*** | Fotocopia compulsada de la primera página de los artículos originales publicados en revistas científicas propias de la especialidad de Reumatología, por alguno de los miembros de la Unidad, últimos tres años |
|
|
| ***43. Artículos publicados en revistas, indexados*** | Fotocopia compulsada de la primera página de los artículos originales publicados en revistas científicas indexadas propias de la especialidad de Reumatología o del área biomédica, por alguno de los miembros de la Unidad, últimos tres años |
|
|
| ***44. Artículos publicados, primer/segundo cuartil*** | Fotocopia compulsada de la primera página de los artículos originales publicados en revistas científicas indexadas propias de la especialidad de reumatología o del área biomédica, por alguno de los miembros de la Unidad, que se encuentren en el primer o segundo cuartil de su especialidad, según el Scientific Citation Index del año en que fueron publicadas. Tres últimos años.  Se adjuntará, además, el lugar relativo que ocupaba el Índice de Impacto de la revista en relación con el resto de Revistas de la Especialidad, en el año de su publicación. Según el “ISI Web of Knowledge” |
| ***45. Participación en Proyectos*** | Certificado original acreditativo de la participación en Proyectos, por alguno de los miembros de la Unidad, expedido por la Entidad Financiadora, como Investigador Principal o Colaborador. Últimos 3 años |
| ***46. Investigación Post MIR*** | Certificado original acreditativo de la participación en Programas Post MIR de Investigación, expedido por la Entidad Financiadora. Se valorarán los que el tutor del Programa sea un miembro de la Unidad . |
| ***47. Tesis doctorales*** | Certificado original acreditativo de Tesis dirigidas o defendidas, expedido por la Universidad correspondiente. |
| ***48. Patentes*** | Fotocopia compulsada de las patentes registradas en los últimos 10 años |
